# Supplementary material
Source: Research Square preprint supplement (doi:10.21203/rs.3.rs-9709154/v1)
Supplement: Supplementary file 1 [file 9aa9dbac9170b302b6870a8e.docx]

**Table S1.** Equipment conditions for ICP-MS/MS and IRMS analysis of *Zanthoxylum bungeanum* samples.

| Descriptions | Conditions | Descriptions | Conditions |
| --- | --- | --- | --- |
| ICP-MS | 7900 Agilent | IRMS | Integra2 |
| Radio frequency power (W) | 1500 | He purge flow (mL/min) | 230 |
| Gas flow rate (L/min) | 15 | Oxidizing furnace (℃) | 1000 |
| Auxiliary gas flow rate (L/min) | 1.8 | Reduction furnace (℃) | 600 |
| He gas flow rate (L/min) | 4.5 | Chromatographic column temperature (℃) | 70 |
| Integration time (s) | 3 | Carrier gas flow rate (mL/min) | 100 |

**Table S2.** Results obtained from the analysis of Garlic powder CRM (GBW10022) and the LOD as well as LQD values of 43 elements.

| Variable | Certified values | Measured values | Recovery (%) | LOD | LQD |
| --- | --- | --- | --- | --- | --- |
| K | 11400±500 | 11639±350 | 102 | 0.1 | 0.3 |
| Ca | 810±80 | 798±66 | 98.5 | 0.08 | 0.3 |
| Mg | 1050±40 | 1057±29 | 100 | 0.02 | 0.1 |
| Al | 210±20 | 175±13 | 83.3 | 0.04 | 0.1 |
| P | 4660±160 | 4348±124 | 93.3 | 0.3 | 1 |
| S | 10100±500 | 9959±361 | 98.6 | 0.2 | 0.5 |
| B | 7.5±0.9 | 6.29±0.2 | 83.9 | 0.4 | 1 |
| Ti | 10±3 | 9.07±0.8 | 90.7 | 0.5 | 1 |
| V | 0.2±0.06 | 0.17±0.06 | 85.0 | 0.008 | 0.02 |
| Mn | 13.4±0.8 | 11.7±0.6 | 87.3 | 0.1 | 0.3 |
| Fe | 205±18 | 175±14 | 85.4 | 0.1 | 0.3 |
| Co | 0.056±0.008 | 0.044±0.007 | 80.4 | 0.01 | 0.03 |
| Ni | 0.92±0.11 | 0.779±0.1 | 84.7 | 0.08 | 0.3 |
| Cu | 4.6±0.4 | 4.4±0.3 | 96.7 | 0.1 | 0 |
| Zn | 21.7±1.4 | 18.7±1.4 | 86.2 | 0.2 | 1 |
| As | 0.31±0.04 | 0.31±0.02 | 99.4 | 0.005 | 0.01 |
| Rb | 6.5±0.2 | 5.5±0.2 | 84.3 | 0.005 | 0.01 |
| Sr | 12.3±1.1 | 11.9±0.8 | 96.7 | 0.4 | 1 |
| Zr | / | / | / | 0.02 | 0.1 |
| Nb | / | / | / | 0.0006 | 0.003 |
| Mo | 0.21±0.02 | 0.18±0.01 | 83.3 | 0.02 | 0.1 |
| Pd | / | / | / | 0.8 | 3 |
| Ag | 0.005 | 0.005±0.0001 | 96.6 | 0.03 | 0.1 |
| Sn | 0.07 | 0.06±0.002 | 85.7 | 0.01 | 0.04 |
| Te | / | / | / | 0.05 | 0.2 |
| Cs | 0.025±0.002 | 0.020±0.002 | 81.2 | 0.002 | 0.01 |
| Ba | 4.1±0.3 | 3.5±0.2 | 84.5 | 0.4 | 1 |
| Tl | 0.02±0.003 | 0.017±0.002 | 85.5 | 0.0008 | 0.003 |
| Pb | 0.72±0.09 | 0.60±0.03 | 83.8 | 0.009 | 0.03 |
| U | 0.075±0.006 | 0.065±0.002 | 86.1 | 0.001 | 0.004 |
| La | 0.092±0.018 | 0.079±0.02 | 86.8 | 0.006 | 0.02 |
| Ce | 0.16±0.03 | 0.13±0.01 | 83.1 | 0.0005 | 0.002 |
| Pr | 0.017±0.002 | 0.013±0.001 | 77.6 | 0.005 | 0.02 |
| Nd | 0.066±0.013 | 0.054±0.007 | 81.1 | 0.0005 | 0.002 |
| Sm | 0.013±0.003 | 0.011±0.002 | 86.9 | 0.001 | 0.003 |
| Eu | 0.0032±0.0008 | 0.0030±0.0005 | 93.4 | 0.0005 | 0.002 |
| Gd | 0.0114±0.002 | 0.0099±0.002 | 87.3 | 0.003 | 0.01 |
| Dy | 0.0089±0.0011 | 0.0074±0.0006 | 82.9 | 0.002 | 0.006 |
| Ho | 0.0016±0.0003 | 0.0012±0.0003 | 76.9 | 0.001 | 0.003 |
| Er | 0.0042±0.0008 | 0.0037±0.0006 | 88.8 | 0.001 | 0.003 |
| Tm | 0.00065 | 0.00051±0.0001 | 78.5 | 0.0005 | 0.001 |
| Yb | 0.0042 | 0.0035±0.0002 | 83.1 | 0.001 | 0.003 |
| Y | 0.057±0.011 | 0.055±0.009 | 96.8 | 0.003 | 0.01 |

Notes: The values of Zr, Pd, Nb and Te are not provided in the certificate of reference material.
